# Supplementary material
Source: publisher site journal article supplement (https://www.dovepress.com/article/266507)

**Supplemental files**

**Supplemental figure 1. Kaplan–Meier analysis of 7 prognostic signatures for patients with breast cancer.**

(A) Kaplan–Meier analysis of MMD; (B) Kaplan–Meier analysis of SLC29A4; (C) Kaplan–Meier analysis of CREB5; (D) Kaplan–Meier analysis of FOS; (E) Kaplan–Meier analysis of ANKRD29; (F) Kaplan–Meier analysis of MYOCD; (G) Kaplan–Meier analysis of PIGR.


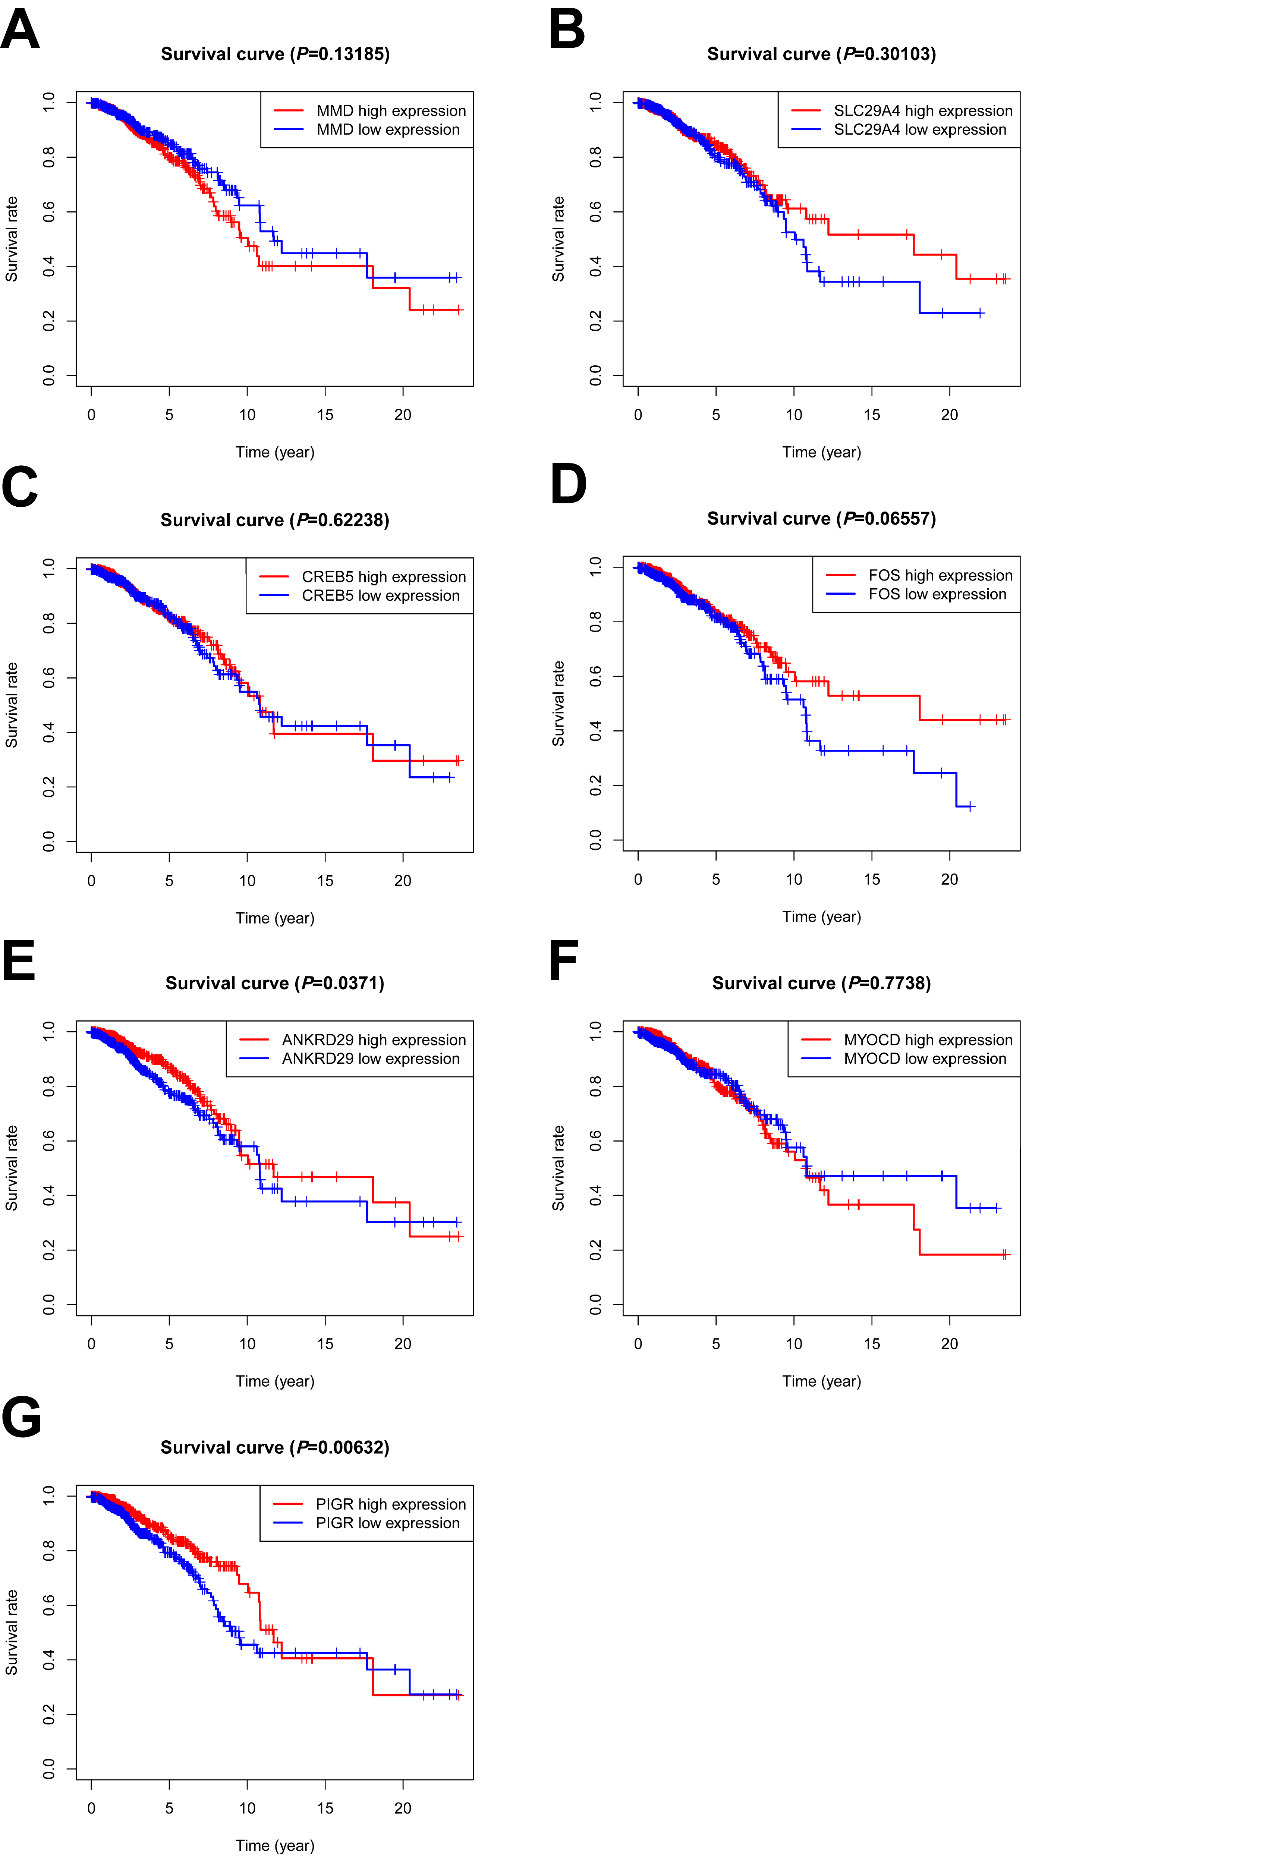

Supplement: Supplementary file 1 [file get_supplementary_file.php]
